# Supplementary material for: A Survey on Undergraduate Medical Students’ Perception of COVID-19 Vaccination
Source: Vaccines (Basel). 2022 Sep 3;10(9):1464. doi: 10.3390/vaccines10091464 (PMC9504072; doi:10.3390/vaccines10091464)
Supplement: Supplementary file 1 [file vaccines-10-01464-s001.zip › vaccines-1863882-supplementary.pdf]

## **Socio-demographic characteristics**

Gender:

- ☐ Male
- ☐ Female
- ☐ I prefer not to specify it

Age (years):

Nationality:

- ☐ Italian
- ☐ Other

If you answered other, please specify your nationality:

County where you lived permanently at the beginning of the pandemic (March 2020):

Housing modality:

- ☐ Alone
- ☐ With family members
- ☐ With friends
- ☐ With cohabitant
- ☐ I prefer not to answer

## **Characteristics relating to the state of health**

Have you contracted SARS-CoV-2 disease?

- ☐ Yes, without the development of symptoms or with mild to moderate symptoms
- ☐ Yes, with hospitalization
- ☐ No
- ☐ I prefer not to answer

Do you suffer from a chronic disease?

- ☐ Yes
- ☐ No

Have you already undergone or will you undergo the COVID-19 vaccine?

- ☐ Yes
- ☐ No, but I plan to do it as soon as possible
- ☐ No
- ☐ I don't know

***Answer only if you have undergone the COVID-19 vaccination***

What was the motivation for getting the COVID vaccine? (It is possible to indicate more than one answer):

- ☐ To protect myself
- ☐ To protect my family
- ☐ For moral responsibility towards the community
- ☐ To get the green pass
- ☐ Other

Indicate other reasons:

***Answer only if you have not undergone the COVID-19 vaccination***

What was your motivation NOT to undergo the COVID vaccine? (It is possible to indicate more than one answer):

- ☐ Fear of vaccines in general
- ☐ Fear of this vaccine
- ☐ Insufficient and hasty experimentation
- ☐ Contradictory information on efficacy and safety
- ☐ Ineffectiveness of the vaccine
- ☐ Sense of compulsion to vaccinate
- ☐ The belief that the vaccination campaign is economic or other propaganda

**Indicates the degree of agreement where 0 is "Not at all", 10 "very much" of agreement**

COVID-19 vaccines have been adequately tested

☒ 0 ☐ 1 ☐ 2 ☐ 3 ☐ 4 ☐ 5 ☐ 6 ☐ 7 ☐ 8 ☐ 9 ☐ 10

COVID-19 vaccines represent an indispensable tool for the protection of individual and public health

☒ 0 ☐ 1 ☐ 2 ☐ 3 ☐ 4 ☐ 5 ☐ 6 ☐ 7 ☐ 8 ☐ 9 ☐ 10

Vaccination against COVID-19 represents an ethical duty for the entire community to protect individual and public health

☒ 0 ☐ 1 ☐ 2 ☐ 3 ☐ 4 ☐ 5 ☐ 6 ☐ 7 ☐ 8 ☐ 9 ☐ 110

It is essential to impose a COVID-19 vaccination obligation on the whole community to protect the fragile population

☒ 0 ☐ 1 ☐ 2 ☐ 3 ☐ 4 ☐ 5 ☐ 6 ☐ 7 ☐ 8 ☐ 9 ☐ 110

It is essential to impose a COVID-19 vaccination obligation on all university students to protect people who cannot access the vaccine for medical reasons

☒ 0 ☐ 1 ☐ 2 ☐ 3 ☐ 4 ☐ 5 ☐ 6 ☐ 7 ☐ 8 ☐ 9 ☐ 110

It is appropriate to exclude the access to the university of teachers / students who, although not presenting medical-health impediments, refuse vaccination against COVID-19

☒ 0 ☐ 1 ☐ 2 ☐ 3 ☐ 4 ☐ 5 ☐ 6 ☐ 7 ☐ 8 ☐ 9 ☐ 110

It is preferable to adopt measures of social distancing and caution than imposing a legal obligation on COVID vaccination

☒ 0 ☐ 1 ☐ 2 ☐ 3 ☐ 4 ☐ 5 ☐ 6 ☐ 7 ☐ 8 ☐ 9 ☐ 110

Evidence on the efficacy and safety of COVID-19 vaccines is uncertain due to their rapid development

☒ 0 ☐ 1 ☐ 2 ☐ 3 ☐ 4 ☐ 5 ☐ 6 ☐ 7 ☐ 8 ☐ 9 ☐ 110

People who refuse to undergo COVID 19 vaccination and fall ill should bear the additional financial burden

☒ 0 ☐ 1 ☐ 2 ☐ 3 ☐ 4 ☐ 5 ☐ 6 ☐ 7 ☐ 8 ☐ 9 ☐ 110

Do you have or are you encouraging your family and / or friends to vaccinate against COVID-19?

- ☒ Yes
- ☐ No
- ☐ Yes, but only to the most fragile persons

What topic would you like to receive more information on? (It is possible to indicate more than one answer):

- ☒ Types of COVID-19 vaccines
- ☒ Effectiveness of COVID-19 vaccines
- ☒ Side effects and safety profile of COVID-19 vaccines
- ☒ I don't think I need to improve my knowledge
- ☒ Other

Specify other topics:
